# Supplementary material
Source: publisher site journal article supplement (https://www.dovepress.com/article/224266)
Supplement: Supplementary file 1 [file get_supplementary_file.php]

**Online supplement to:**

**Single-Use Autoinjector Functionality and Reliability for At-Home**

**Administration of Benralizumab for Patients with Severe Asthma: GRECO**

**Trial Results**

Gary T. Ferguson<sup>1</sup>, Jeremy Cole<sup>2</sup>, Magnus Aurivillius<sup>3</sup>, Paul Roussel<sup>4</sup>, Peter Barker<sup>4</sup>,  
Ubaldo J. Martin<sup>4</sup>, on behalf of the GRECO study investigators

<sup>1</sup>Pulmonary Research Institute of Southeast Michigan, Farmington Hills, MI, USA;

<sup>2</sup>OK Clinical Research, LLC, Edmond, OK, USA; <sup>3</sup>AstraZeneca, Mölndal, Sweden;

<sup>4</sup>AstraZeneca, Gaithersburg, MD, USA

### Supplemental Table 1. Study Sites

| Site number | Site name and address                                                    |
|-------------|--------------------------------------------------------------------------|
| 1001        | C.I.C. Mauricie Inc, Trois-Rivières, QC, Canada                          |
| 1002        | Kanata Allergy Services Ltd, Kanata, ON, Canada                          |
| 1003        | Office of Dr Jaime Del Carpio, Montréal, QC, Canada                      |
| 1004        | Hôpital du Sacré-Coeur de Montréal, Montréal, QC, Canada                 |
| 1005        | Synergy Respiratory & Cardiac Care, Sherwood Park, AB, Canada            |
| 1006        | Cheema Research Inc, Mississauga, ON, Canada                             |
| 1008        | Dynamic Drug Advancement Ltd, Ajax, ON, Canada                           |
| 1009        | CIUSSS de l'Estrie-CHUS, Sherbrooke, QC, Canada                          |
| 1010        | Burlington Lung Clinic, Burlington, ON, Canada                           |
| 1011        | Clinique Spécialisée en Allergie de la Capitale, Québec City, QC, Canada |
| 1014        | Recherche Clinique Sigma, Québec City, QC, Canada                        |
| 7801        | Allergy & Asthma Research Center, PA, San Antonio TX, USA                |
| 7802        | Allergy and Asthma Specialists, PA, Minneapolis, MN, USA                 |
| 7803        | Advanced Clinical Research Associates, Plano, TX, USA                    |
| 7804        | Wellness Clinical Research Associates, McKinney, TX, USA                 |
| 7809        | Georgia Pollens Clinical Research Centers, Inc, Albany, GA, USA          |
| 7810        | OK Clinical Research, LLC, Edmond, OK, USA                               |
| 7811        | TTS Research, Boerne, TX, USA                                            |
| 7813        | Finlay Medical Research Corp, Miami, FL, USA                             |
| 7815        | California Medical Research Associates, Inc, Northridge, CA, USA         |
| 7816        | Allianz Research Institute Inc, Westminster, CA, USA                     |
| 7818        | Florida Pulmonary Research Institute, Winter Park, FL, USA               |
| 7820        | Empirical Medical Research, Canton, OH, USA                              |
| 7826        | The Clinical Research Center, St. Louis, MO, USA                         |
| 7828        | Integrated Research Group Inc, Riverside, CA, USA                        |
